# Supplementary material
Source: PubMed Central journal article supplement (PMC8099555)
Supplement: mmc1.pdf [file mmc1.pdf]

# **Abnormal liver tests in patients with SARS-CoV-2 or influenza – prognostic similarities and temporal disparities**

Noa Shafran, Assaf Issachar, Tzippy Shochat, Inbal Haya Shafran, Michael  
Bursztyn, Amir Shlomai

## Table of contents

|               |   |
|---------------|---|
| Table S1..... | 2 |
| Fig. S1.....  | 4 |
| Fig. S2.....  | 5 |
| Fig. S3.....  | 6 |
| Fig. S4.....  | 7 |

**Table S1. Univariate analysis of various parameters with a composite outcome of death or mechanical ventilation during hospitalization.**

|                                        | Influenza |               |               |         | SARS-Cov-2 |               |               |         |
|----------------------------------------|-----------|---------------|---------------|---------|------------|---------------|---------------|---------|
|                                        | OR        | Lower 95% C.L | Upper 95% C.L | p value | OR         | Lower 95% C.L | Upper 95% C.L | p value |
| Age                                    | 1.04      | 1.02          | 1.057         | <0.0001 | 1.037      | 1.025         | 1.048         | <0.0001 |
| Gender                                 | 1.148     | 0.712         | 1.851         | 0.570   | 1.567      | 1.115         | 2.201         | 0.010   |
| BMI                                    | 0.965     | 0.92          | 1.012         | 0.139   | 0.991      | 0.965         | 1.019         | 0.535   |
| CV disease                             | 1.526     | 0.945         | 2.464         | 0.084   | 2.225      | 1.579         | 3.135         | <0.0001 |
| Liver Disease                          | 1.27      | 0.43          | 3.68          | 0.658   | 1.32       | 0.516         | 3.375         | 0.563   |
| GGT $\geq$ 40                          | 5.14      | 2.96          | 8.92          | <0.0001 | 4.92       | 3.26          | 7.42          | <0.0001 |
| GOT $\geq$ 40                          | 6.02      | 3.57          | 10.14         | <0.0001 | 8.877      | 5.932         | 13.284        | <0.0001 |
| GPT $\geq$ 40                          | 3.76      | 2.314         | 6.126         | <0.0001 | 3.569      | 2.535         | 5.023         | <0.0001 |
| Bilirubin <sub>max</sub>               | 1.485     | 1.213         | 1.819         | <0.0001 | 1.886      | 1.562         | 2.277         | <0.0001 |
| Albumin <sub>min</sub>                 | 0.184     | 0.127         | 0.267         | <0.0001 | 0.085      | 0.085         | 0.123         | <0.0001 |
| CRP <sub>max</sub>                     | 1.079     | 1.058         | 1.10          | <0.0001 | 1.126      | 1.106         | 1.146         | <0.0001 |
| Lymph <sub>min</sub>                   | 0.12      | 0.05          | 0.29          | <0.0001 | 0.935      | 0.802         | 1.089         | 0.387   |
| PT/INR <sub>max</sub>                  | 1.485     | 1.102         | 2.003         | 0.009   | 4.295      | 2.596         | 7.107         | <0.0001 |
| Systolic BP <sub>min</sub>             | 0.947     | 0.934         | 0.960         | <0.0001 | 0.953      | 0.943         | 0.963         | <0.0001 |
| Blood oxygen Saturation <sub>min</sub> | 0.885     | 0.854         | 0.917         | <0.0001 | 0.862      | 0.840         | 0.884         | <0.0001 |
| Anti-viral treatment                   | 1.16      | 0.609         | 2.208         | 0.65    | 2.359      | 1.628         | 3.418         | <0.0001 |
| Antibiotics                            | 6.108     | 2.617         | 14.253        | <0.0001 | 5.636      | 3.767         | 8.434         | <0.0001 |
| Length of hospitalization              | 1.061     | 1.038         | 1.085         | <0.0001 | 1.103      | 1.082         | 1.125         | <0.0001 |

|                       |       |       |       |         |        |       |        |         |
|-----------------------|-------|-------|-------|---------|--------|-------|--------|---------|
| In Hospital pneumonia | 3.775 | 2.283 | 6.242 | <0.0001 | 2.225  | 1.079 | 4.588  | 0.030   |
| ICU                   | 8.988 | 3.652 | 22.12 | <0.0001 | 13.865 | 7.184 | 26.760 | <0.0001 |
| Enoxaparin            |       |       |       |         | 4.20   | 2.83  | 6.24   | <0.0001 |
| Remdesivir            |       |       |       |         | 3.69   | 2.41  | 5.63   | <0.0001 |
| Dexamethasone         |       |       |       |         | 7.46   | 5.14  | 10.82  | <0.0001 |

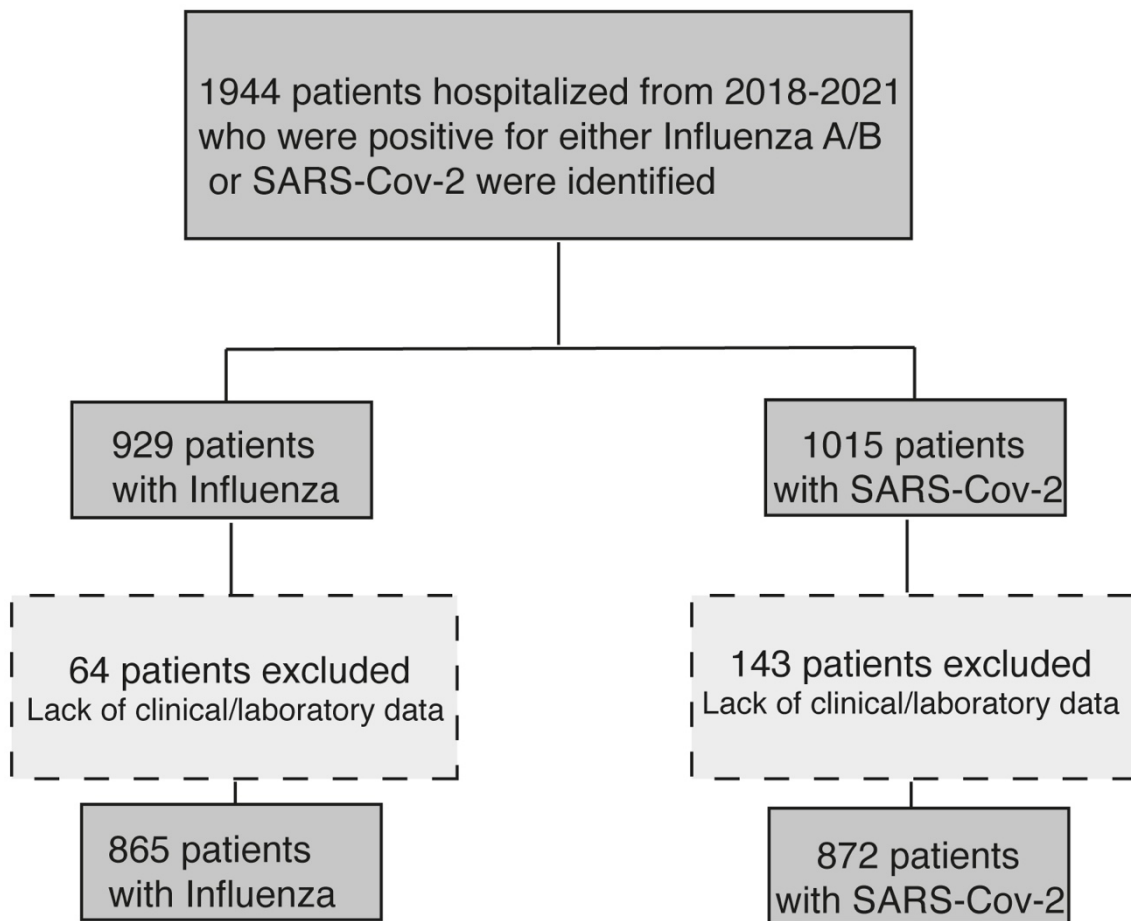

**Fig S1.** Study flow-chart

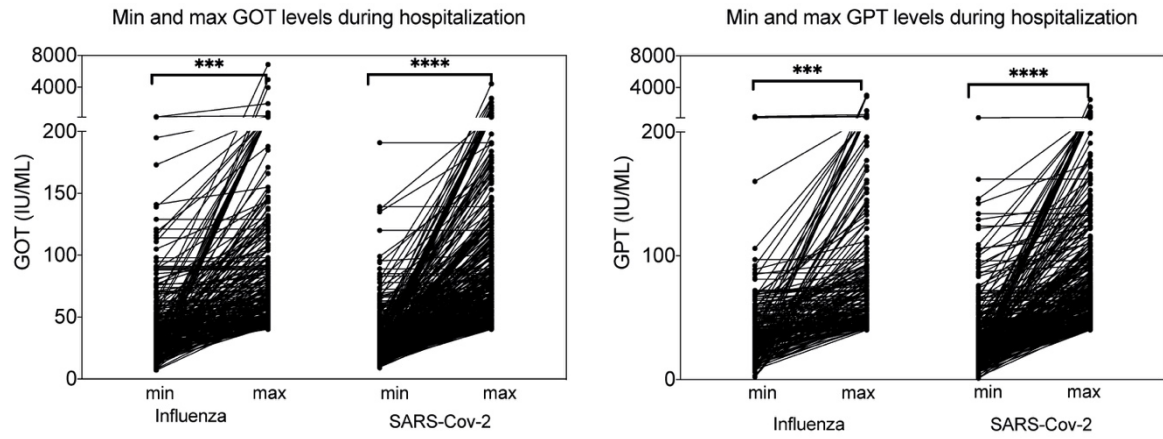

**Fig S2.** Comparison of minimal and maximal levels of liver tests during hospitalization among patients with abnormal liver tests according to the type of infection. Statistical differences were calculated using unpaired t test (asterisk indicate statistical significance).

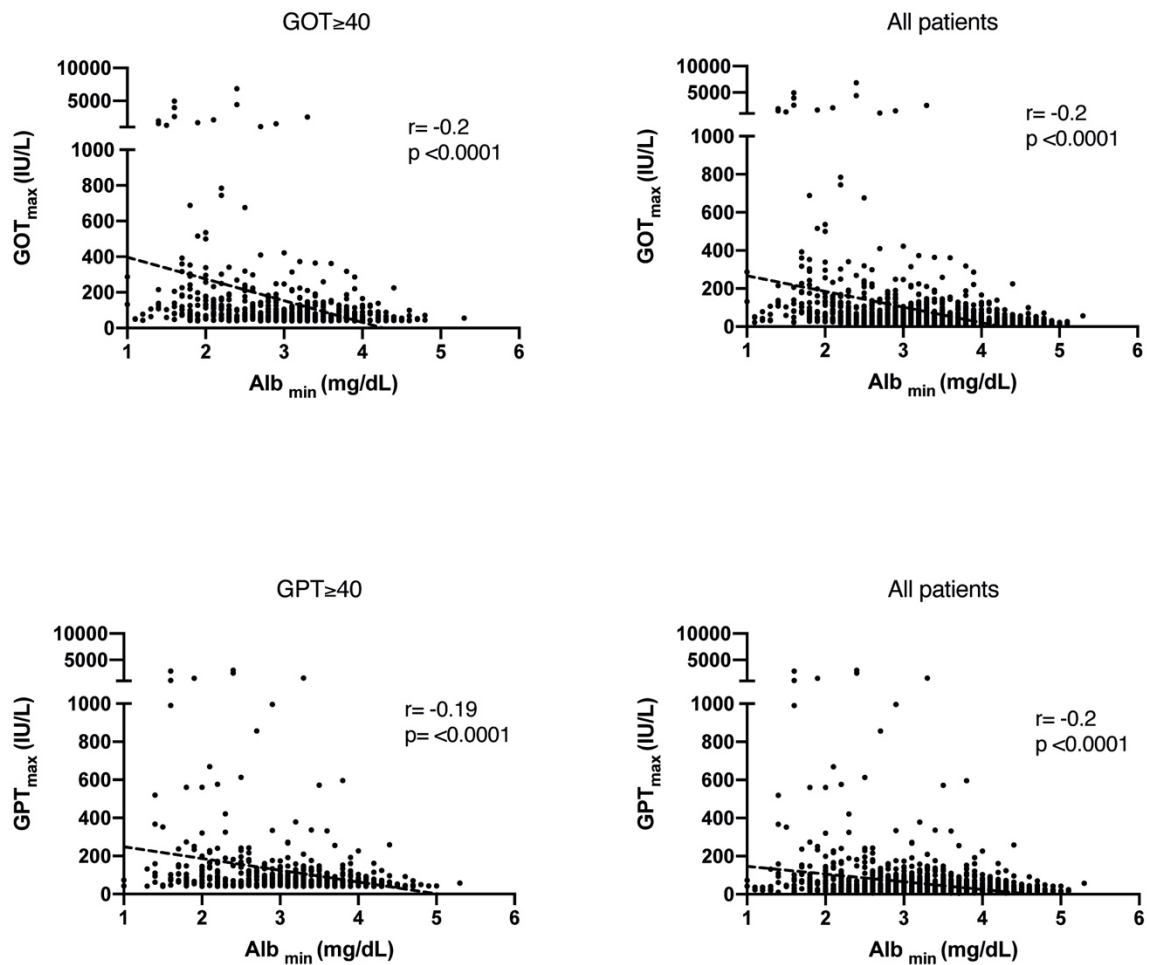

**Fig S3. Correlation curves between serum albumin<sub>min</sub> and peak liver tests levels during hospitalization.** A pearson's correlation analysis of the maximal level of each liver test (GPT or GOT) and minimal albumin level during hospitalization are displayed, with the corresponding pearson's correlation coefficient (r) values and their p values. Left panels display the results only for patients with abnormal liver tests and right panels display the results for all hospitalized patients (regardless of the type of infection).

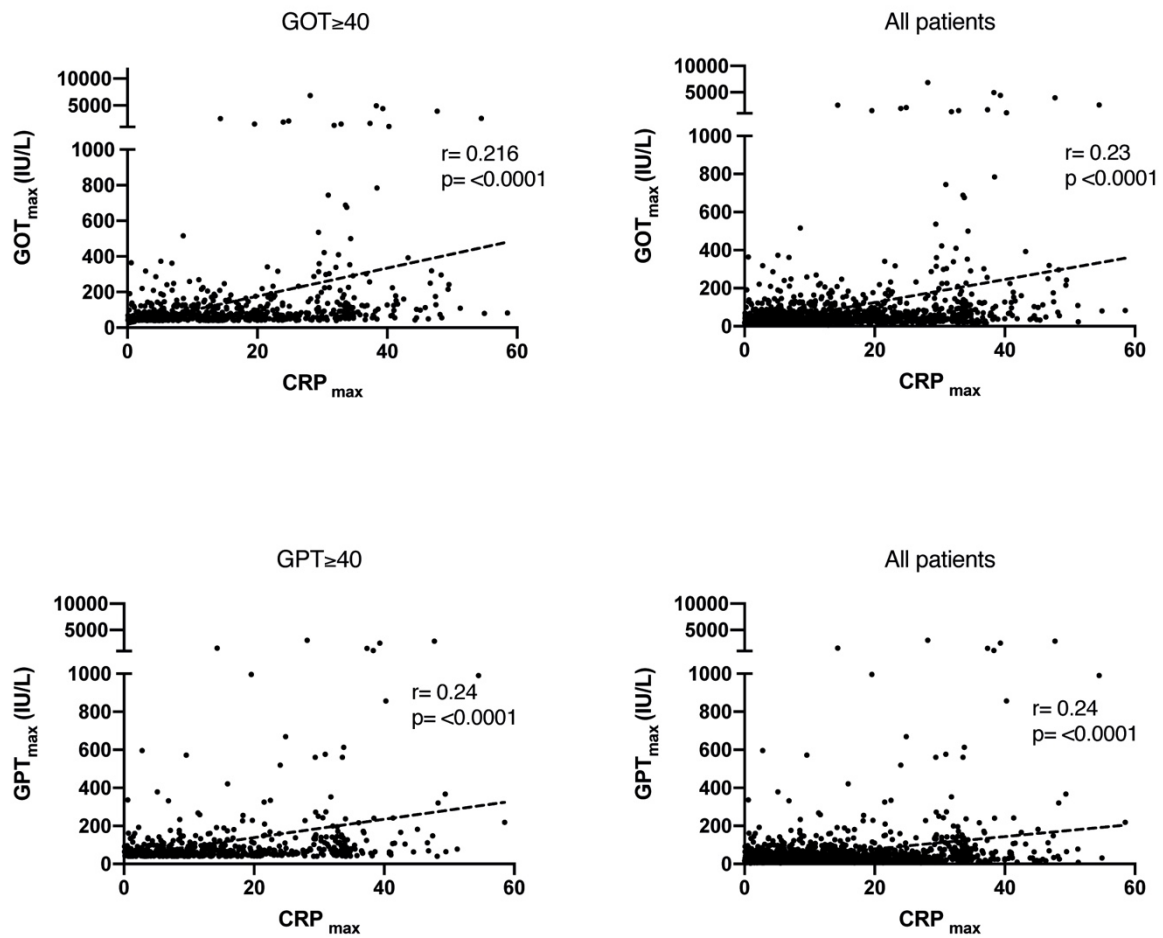

**Fig S4. Correlation curves between serum  $CRP_{max}$  and peak liver tests levels during hospitalization.** A Pearson's correlation analysis of the maximal level of each liver test (GPT or GOT) and maximal CRP level during hospitalization are displayed with the corresponding Pearson's correlation coefficient ( $r$ ) values and their  $p$  values. Left panels display the results only for patients with abnormal liver tests and right panels display the results for all hospitalized patients (regardless of the type of infection).
